# Supplementary material
Source: publisher site journal article supplement (https://www.degruyterbrill.com/publication/isbn/9783110338713/downloadAsset/9783110338713_Inhaltsverzeichnis.pdf)
Supplement: Supplementary file 1 [file 9783110338713_Inhaltsverzeichnis.pdf]

# Inhalt

|            |                                                                                                                 |
|------------|-----------------------------------------------------------------------------------------------------------------|
| <b>I</b>   | <b>Zur Gegenstandsbestimmung der Dialektologie — 1</b>                                                          |
| 1          | Bezeichnungs- und Bedeutungsgeschichte zentraler Kategorien — 1                                                 |
| 2          | Kleiner systematischer Abriss wichtiger Grundbegriffe — 5                                                       |
| <b>II</b>  | <b>Dialektologische Arbeitsverfahren — 12</b>                                                                   |
| 1          | Voraussetzungen — 12                                                                                            |
| 1.1        | Anforderungen an das Korpus — 12                                                                                |
| 1.2        | Anforderungen an die Gewährsleute — 13                                                                          |
| 1.3        | Anforderungen an die Exploratoren — 14                                                                          |
| 2          | Datenerhebung — 15                                                                                              |
| 2.1        | Beobachtung — 15                                                                                                |
| 2.2        | Befragung — 16                                                                                                  |
| 2.2.1      | Direkte Befragung — 16                                                                                          |
| 2.2.2      | Indirekte Befragung — 17                                                                                        |
| 2.2.3      | Befragungsinstrumentarium — 18                                                                                  |
| 3          | Transkription — 20                                                                                              |
| 4          | Datenpräsentation — 23                                                                                          |
| 4.1        | Ältere vergleichende Sammlungen — 23                                                                            |
| 4.2        | Dokumentarische Präsentation — 25                                                                               |
| 4.3        | Kartographische Präsentation — 28                                                                               |
| 4.3.1      | Kartiermethoden — 28                                                                                            |
| 4.3.2      | Kartentypen — 32                                                                                                |
| 4.4        | Sprachatlas — 35                                                                                                |
| 4.5        | Monographie — 39                                                                                                |
| 4.6        | Wörterbuch — 40                                                                                                 |
| 5          | Computative Verfahren — 44                                                                                      |
| 5.1        | Computative Lexikographie — 45                                                                                  |
| 5.2        | Computative Sprachkartographie — 48                                                                             |
| 5.3        | Dialektometrische Verfahren — 52                                                                                |
| 5.4        | Dialektalitätsmessung — 53                                                                                      |
| <b>III</b> | <b>Wege und Schwerpunkte der deutschen Dialektologie — 57</b>                                                   |
| 1          | Die Anfänge der Dialektologie — 57                                                                              |
| 1.1        | „Vor- und frühwissenschaftliche“ Beschäftigung mit mundartlichem Wortschatz: Idiotismensammlungen/Idiotika — 57 |
| 1.2        | Begründung der wissenschaftlichen Dialektologie im 19. Jahrhundert: Johann Andreas Schmeller — 61               |
| 2          | Herausbildung und Entwicklung der Dialektgeographie: Die „Marburger Schule“ — 63                                |

|       |                                                                                                                               |     |
|-------|-------------------------------------------------------------------------------------------------------------------------------|-----|
| 2.1   | „Deutscher Sprachatlas“ (DSA) —                                                                                               | 63  |
| 2.2   | „Deutscher Wortatlas“ (DWA) —                                                                                                 | 71  |
| 2.3   | „Digitaler Wenker-Atlas“ (DiWA) —                                                                                             | 74  |
| 3     | Linguistisierung der Dialektologie —                                                                                          | 77  |
| 3.1   | Strukturelle Dialektologie —                                                                                                  | 78  |
| 3.1.1 | Der strukturelle Ansatz —                                                                                                     | 78  |
| 3.1.2 | Vokalische Diasysteme —                                                                                                       | 80  |
| 3.1.3 | Strukturelle Wortgeographie —                                                                                                 | 81  |
| 3.2   | Möglichkeiten und Grenzen einer generativen Dialektologie —                                                                   | 84  |
| 4     | Dialekteinteilung —                                                                                                           | 88  |
| 4.1   | Ältere Gliederungen der deutschen Mundarten —                                                                                 | 90  |
| 4.2   | Strukturelle Dialekteinteilung im Niederdeutschen —                                                                           | 93  |
| 4.3   | Dialektometrische Dialekteinteilung am Beispiel des Projekts<br>„Rheinische Wortgeographie“ —                                 | 97  |
| 4.4   | Dialekteinteilung auf der Grundlage von Datenaggregation —                                                                    | 102 |
| 5     | Interpretation von Dialektgrenzen I: Die extralinguistische Methode am<br>Beispiel der ostmitteldeutschen Dialektlandschaft — | 105 |
| 5.1   | Koinzidenz von Dialekt- und (alten) Verkehrsscheiden —                                                                        | 108 |
| 5.2   | Mischgebiete —                                                                                                                | 108 |
| 5.3   | Enklaven —                                                                                                                    | 109 |
| 5.4   | Weitere geographische Verbreitungsbilder dialektaler Befunde —                                                                | 110 |
| 5.5   | Staffellandschaft —                                                                                                           | 112 |
| 5.6   | Heranziehung historischen Sprachmaterials —                                                                                   | 114 |
| 6     | Interpretation von Dialektgrenzen II: Die intralinguistische Methode am<br>Beispiel der ostschweizerischen Vokalspaltung —    | 115 |
| 6.1   | Koinzidenz von Isoglossen —                                                                                                   | 116 |
| 6.2   | „Narben“ —                                                                                                                    | 119 |
| 7     | Die Dialektlexikographie am Beispiel des „Thüringischen<br>Wörterbuchs“ —                                                     | 122 |
| 7.1   | Materialgrundlage —                                                                                                           | 123 |
| 7.2   | Lemmaansatz —                                                                                                                 | 125 |
| 7.3   | Anordnung der Stichwörter —                                                                                                   | 125 |
| 7.4   | Verbreitungsangaben —                                                                                                         | 126 |
| 7.5   | Wörterbuchartikel —                                                                                                           | 127 |
| 7.5.1 | Allgemeines —                                                                                                                 | 127 |
| 7.5.2 | Grammatische Kategorisierung —                                                                                                | 127 |
| 7.5.3 | Semantische und syntaktische Angaben —                                                                                        | 128 |
| 7.5.4 | Formenteil —                                                                                                                  | 129 |
| 7.5.5 | Sach- und Volkskundliches —                                                                                                   | 130 |
| 7.5.6 | Angaben zur Etymologie —                                                                                                      | 130 |
| 7.5.7 | Wörterbuchkarten —                                                                                                            | 131 |
| 7.6   | Artikelvernetzung —                                                                                                           | 132 |

|          |                                                                                                                 |
|----------|-----------------------------------------------------------------------------------------------------------------|
| 8        | Zweidimensionale Dialektgeographie am Beispiel des „Mittelrheinischen Sprachatlasses“ (MRhSA) — <b>133</b>      |
| 8.1      | Forschungsziel — <b>134</b>                                                                                     |
| 8.2      | Kontrastive Sprachkartographie — <b>135</b>                                                                     |
| 8.3      | Kontrastive Interpretation einer MRhSA-Karte — <b>136</b>                                                       |
| 8.4      | Dialektalitätsareale — <b>138</b>                                                                               |
| 9        | Dialektsyntaxgeographie am Beispiel des „Syntaktischen Atlases der deutschen Schweiz“ (SADS) — <b>139</b>       |
| 9.1      | Zum Problem der Erhebungsmethoden dialektaler Syntax — <b>140</b>                                               |
| 9.2      | Der „Syntaktische Atlas der deutschen Schweiz“ (SADS) — <b>142</b>                                              |
| 9.3      | Zur Geographie des Anschlusses finaler Infinitive — <b>146</b>                                                  |
| 10       | Historische Dialektgeographie am Beispiel des „Historischen Südwestdeutschen Sprachatlasses“ (HSS) — <b>150</b> |
| 10.1     | Historische Sprachdaten — <b>152</b>                                                                            |
| 10.2     | Anlage des HSS — <b>154</b>                                                                                     |
| 10.3     | Besprechung einer HSS-Karte — <b>156</b>                                                                        |
| 11       | Alltagssprachenforschung I: Sprachgeographische Ansätze — <b>158</b>                                            |
| 11.1     | Erste Ansätze: „Wortatlas der deutschen Umgangssprachen“ (WDU) — <b>159</b>                                     |
| 11.1.1   | Anlage des WDU — <b>159</b>                                                                                     |
| 11.1.2   | Der WDU als Ausgangspunkt weiterführender Forschungen — <b>162</b>                                              |
| 11.2     | „Atlas zu deutschen Alltagssprache“ (AdA) — <b>165</b>                                                          |
| 11.3     | Soziolinguistisch verschränkt: „Wortgeographie der städtischen Alltagssprache in Hessen“ (WSAH) — <b>168</b>    |
| 11.4     | Regionale Sprachfärbung: Aussprache des „Gebrauchsstandarddeutschen“ — <b>170</b>                               |
| 12       | Alltagssprachenforschung II: Mehrdimensionale Ansätze — <b>174</b>                                              |
| 12.1     | „Sprachvariation in Norddeutschland“ (SiN) — <b>174</b>                                                         |
| 12.2     | „Regionalsprache.de“ (REDE) — <b>177</b>                                                                        |
| 12.3     | „Gesprochene Standardsprache in der Deutschschweiz“ — <b>178</b>                                                |
| 12.4     | „Deutsch heute“ — <b>179</b>                                                                                    |
| 13       | Synchrone gesellschaftsbezogene Dialektologie — <b>182</b>                                                      |
| 13.1     | Skizze des Forschungshorizonts — <b>182</b>                                                                     |
| 13.2     | Dialekte in ihrer sozialen und situativen Bindung — <b>184</b>                                                  |
| 13.2.1   | Bundesweite und großregionale Sprachdemoskopie in der Bundesrepublik — <b>185</b>                               |
| 13.2.1.1 | Dialektbeherrschung — <b>186</b>                                                                                |
| 13.2.1.2 | Dialektgebrauch — <b>193</b>                                                                                    |
| 13.2.2   | Ortspunktbezogene Untersuchungen — <b>195</b>                                                                   |
| 13.2.2.1 | Erftstadt-Erp (‘Erp-Projekt’) — <b>196</b>                                                                      |
| 13.2.2.2 | Wittlich/Eifel — <b>199</b>                                                                                     |
| 13.2.2.3 | Schleswig — <b>200</b>                                                                                          |

|           |                                                                                                 |            |
|-----------|-------------------------------------------------------------------------------------------------|------------|
| 13.2.2.4  | Basel —                                                                                         | <b>202</b> |
| 13.2.3    | Aspektbezogene Untersuchungen (Geschlecht, Alter, Beruf) —                                      | <b>205</b> |
| 13.2.3.1  | Geschlecht und Dialekt —                                                                        | <b>205</b> |
| 13.2.3.2  | Alter und Dialekt —                                                                             | <b>208</b> |
| 13.2.3.3  | Beruf und Dialekt —                                                                             | <b>210</b> |
| 13.3      | Dialekte in der sozialen Wahrnehmung und Beurteilung —                                          | <b>214</b> |
| 13.3.1    | Dialekte im gesellschaftlichen Bewusstsein —                                                    | <b>214</b> |
| 13.3.2    | Dialekte in der gesellschaftlichen Bewertung —                                                  | <b>216</b> |
| 13.3.2.1  | Historischer Zusammenhang —                                                                     | <b>216</b> |
| 13.3.2.2  | Synchrone Bewertung von Dialekt/Regionalsprache —                                               | <b>219</b> |
| 13.3.3    | Dialekt und die ‚komische Dimension‘ —                                                          | <b>227</b> |
| 14        | Angewandte Dialektologie —                                                                      | <b>232</b> |
| 14.1      | Dialekt und Schule —                                                                            | <b>232</b> |
| 14.1.1    | Problemzusammenhang —                                                                           | <b>232</b> |
| 14.1.2    | Grundkonstellationen im deutschen Sprachraum: Notwendigkeit einer differenzierten Betrachtung — | <b>233</b> |
| 14.1.3    | Schulschwierigkeiten aufgrund der Herkunftssprache —                                            | <b>234</b> |
| 14.1.4    | Perspektiven einer dialektbezogenen Sprachdidaktik —                                            | <b>237</b> |
| 14.1.5    | Dialekt in ausgewählten aktuellen Lehrplänen —                                                  | <b>239</b> |
| 14.2      | Dialekt und Medien —                                                                            | <b>242</b> |
| 14.2.1    | Tagespresse —                                                                                   | <b>242</b> |
| 14.2.1.1  | ‚Mundart-Kolumnen‘ —                                                                            | <b>242</b> |
| 14.2.1.2  | Anzeigen, Werbung etc. —                                                                        | <b>243</b> |
| 14.2.1.3  | Radio und TV —                                                                                  | <b>244</b> |
| 14.2.1.4  | Internet, Chat etc. —                                                                           | <b>245</b> |
| <b>IV</b> | <b>Die deutschen Dialektgebiete im Überblick —</b>                                              | <b>247</b> |
| 1         | Vorbemerkungen —                                                                                | <b>247</b> |
| 2         | Überblick über die deutschen Dialektgebiete —                                                   | <b>250</b> |
| 3         | Textproben —                                                                                    | <b>253</b> |
| <b>V</b>  | <b>Auswahlbibliographie —</b>                                                                   | <b>256</b> |
